# Supplementary material for: Prevalence of Asthma and COPD and Blood Eosinophil Count in a Middle-Aged Belgian Population
Source: PubMed Central journal article supplement (PMC6723474; doi:10.3390/jcm8081122), 2019-07-28
Supplement: jcm-08-01122-s001.pdf [file jcm-08-01122-s001.pdf]

## SUPPLEMENTARY INFORMATION

**Figure S1.** Estimated probability of COPD according to pack-years

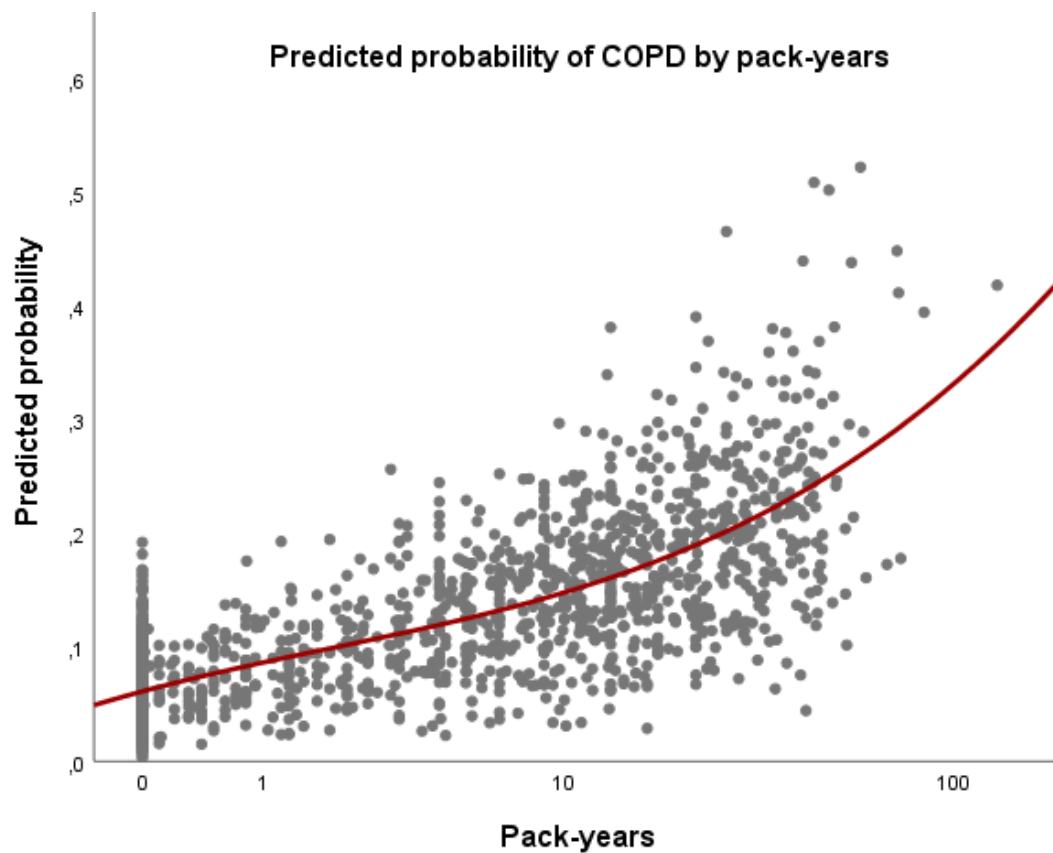

Estimated probability of COPD (y-scale) according to pack-years (x-scale) after adjustment for age, sex, BMI and eosinophil percentage.

**Figure S2.** Characteristics of cases with current asthma and clinical COPD

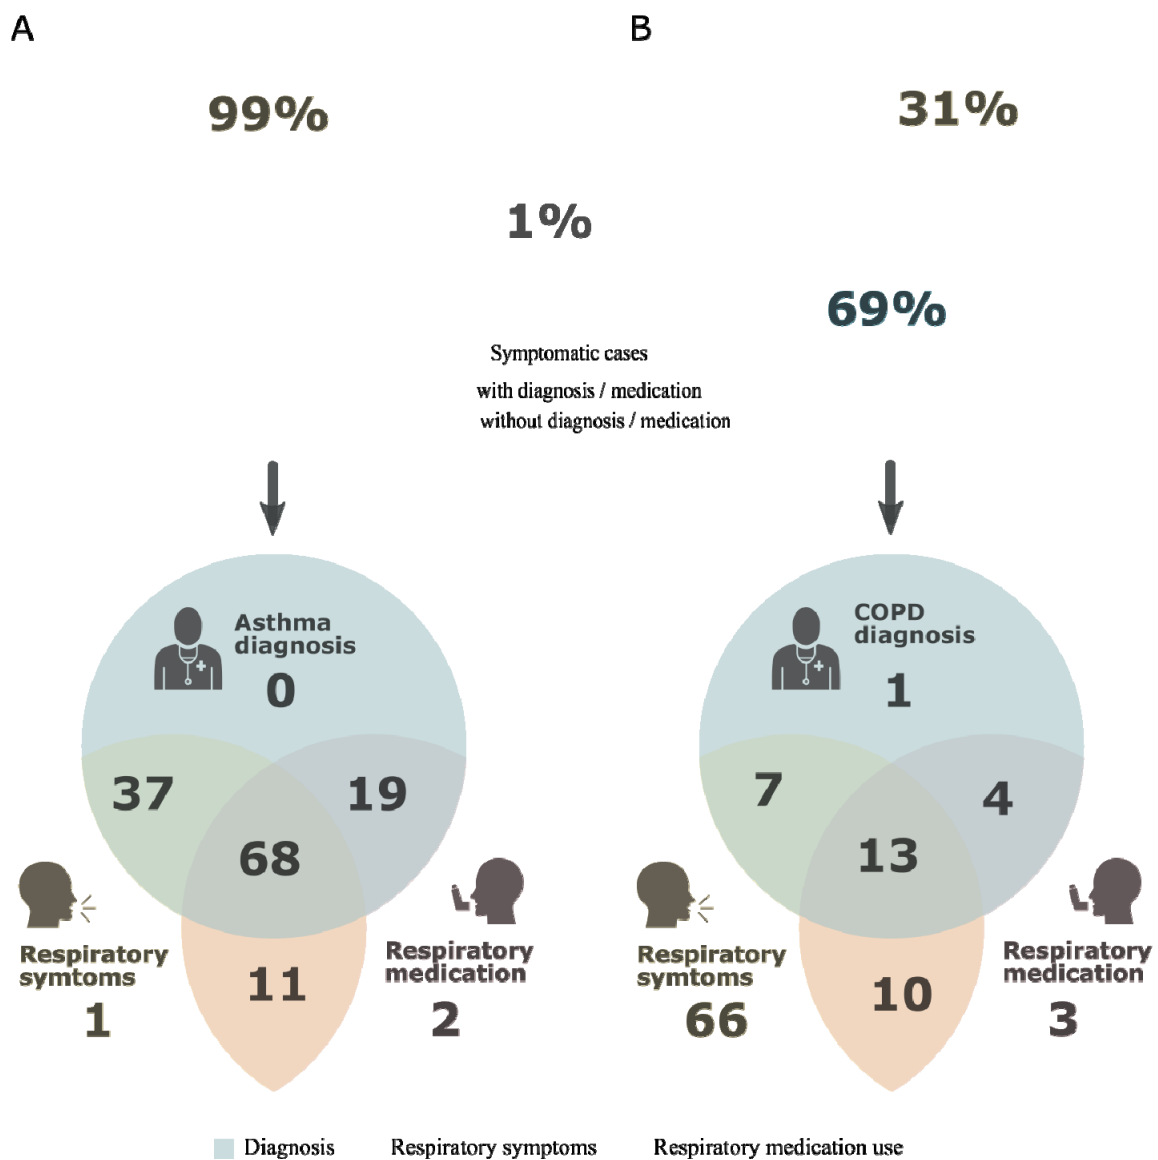

Proportion of symptomatic cases with or without diagnosis and / or respiratory medication use in current asthma (A) and clinical COPD (B). In both current asthma and clinical COPD, 1 subject did not fill in the ECRHS3 questionnaire and they were classified in the figure as if they did not have respiratory symptoms.

**Table S1.** Characteristics of COPD cases stratified by >10 pack-years and ≤10 pack-years of smoking history

| Subject characteristics                                | COPD ≤10 pack-years (n=107) | COPD >10 pack-years (n=99) | P      |
|--------------------------------------------------------|-----------------------------|----------------------------|--------|
| Age (year)                                             | 56.0 ± 6.0                  | 58.7 ± 4.9                 | 0.001  |
| Male (%)                                               | 62 (57.9%)                  | 68 (68.7%)                 | 0.110  |
| Higher education                                       | 44 (41.1%)                  | 35 (36.1%)                 | 0.461  |
| Clinical COPD                                          | 42 (39.3%)                  | 62 (62.6%)                 |        |
| <b>Lung function</b>                                   |                             |                            |        |
| Current respiratory symptoms (%)                       | 36 (33.6%)                  | 60 (60.6%)                 | <0.001 |
| FEV1 percent predicted (%)                             | 93.1 ± 15.1                 | 81.0 ± 19.2                | <0.001 |
| FVC percent predicted (%)                              | 111.3 ± 17.6                | 99.4 ± 18.0                | <0.001 |
| FEV1/FVC (%)                                           | 65.8 ± 4.5                  | 63.1 ± 6.9                 | 0.001  |
| <b>Characteristics of metabolic syndrome</b>           |                             |                            |        |
| BMI (kg/m <sup>2</sup> )                               | 25.7 ± 3.7                  | 25.8 ± 4.2                 | 0.856  |
| Systolic blood pressure (mmHg)                         | 129.7 ± 13.2                | 129.0 ± 16.6               | 0.720  |
| Diastolic blood pressure (mmHg)                        | 81.7 ± 9.4                  | 78.5 ± 10.7                | 0.024  |
| Total cholesterol (mg/dL)                              | 210.5 ± 33.0                | 198.8 ± 42.3               | 0.026  |
| Triglycerides (mg/dL)                                  | 81.0 (60.0-118.0)           | 93.5 (69.0-127.3)          | 0.058  |
| Glycaemia (mg/dL)                                      | 93.9 ± 10.4                 | 99.3 ± 16.2                | 0.005  |
| <b>Inflammatory parameters</b>                         |                             |                            |        |
| High sensitive CRP (mg/L)                              | 0.85 (0.46-1.83)            | 1.03 (0.54-2.03)           | 0.289  |
| White blood cell count (10 <sup>9</sup> /L)            | 6.7 ± 1.8                   | 7.5 ± 2.1                  | 0.002  |
| Eosinophils percentage (%)                             | 2.2 (1.3-3.4)               | 2.3 (1.6-3.4)              | 0.450  |
| <b>Comorbidities</b>                                   |                             |                            |        |
| Arterial hypertension                                  | 46 (43.0%)                  | 49 (49.5%)                 | 0.349  |
| Overweight (BMI≥25 and<30 kg/m <sup>2</sup> )          | 45 (42.1%)                  | 40 (40.4%)                 | 0.810  |
| Obese (BMI≥30 kg/m <sup>2</sup> )                      | 11 (10.3%)                  | 12 (12.1%)                 | 0.675  |
| Type 2 diabetes                                        | 4 (3.7%)                    | 11 (11.1%)                 | 0.042  |
| Mild renal function impairment (eGFR 60-89)            | 73 (68.2%)                  | 58 (58.6%)                 | 0.151  |
| Moderate to severe renal function impairment (eGFR<60) | 5 (4.7%)                    | 3 (3.0%)                   | 0.542  |
| Atopy                                                  | 24 (24.7%)                  | 11 (12.1%)                 | 0.026  |
| <b>Laboratory parameters</b>                           |                             |                            |        |
| eGFR (ml/min/1.73m <sup>2</sup> )                      | 84.2 ± 17.0                 | 85.7 ± 15.8                | 0.523  |
| Creatinine (mg/dL)                                     | 9.1 ± 1.7                   | 9.1 ± 1.8                  | 0.834  |
| Microalbuminuria (mg/L)                                | 6.1 (4.1-9.0)               | 6.6 (4.5-11.7)             | 0.138  |
| Hematocrit (%)                                         | 41.7 ± 2.9                  | 42.7 ± 3.0                 | 0.016  |
| Thrombocytes (10 <sup>9</sup> /L)                      | 245.4 ± 49.0                | 246.7 ± 52.5               | 0.858  |
| <b>Respiratory medication</b>                          |                             |                            |        |
| Respiratory medication use                             | 9 (8.4%)                    | 21 (21.2%)                 | 0.009  |
| Self-reported respiratory medication use               | 9 (8.7%)                    | 20 (20.8%)                 | 0.015  |
| GP reported respiratory medication use (ATC R03):      | 5 (4.7%):                   | 14 (14.1%):                | 0.019  |
| ICS                                                    | 4 (3.7%)                    | 12 (12.1%)                 | 0.025  |
| LABA                                                   | 4 (3.7%)                    | 13 (13.1%)                 | 0.014  |
| LAMA                                                   | 1 (0.9%)                    | 1 (1.0%)                   | 0.956  |
| <b>Other medication</b>                                |                             |                            |        |
| Oral corticosteroids (ATC H02)                         | 0 (0.0%)                    | 3 (3.0%)                   | N.A.   |
| Oral anti-histaminica (ATC H06)                        | 3 (2.8%)                    | 1 (1.0%)                   | 0.351  |

Manuscript submission template:

SABA = short-acting beta-agonist, LABA = long-acting beta-agonist, LAMA = long-acting muscarinic antagonist, ICS = inhalation corticosteroids, OCS = oral corticosteroids, N.A. = not applicable.
